# Supplementary material
Source: MDPI journal article supplement (https://www.mdpi.com/2813-2475/2/1/3)
Supplement: s1 [file s1]

Archive with 2 entries (2 files):
- jvd-2094475-Supplementary File S1.pdf
- jvd-2094475-Supplementary Video S1.mp4
